# Supplementary material for: Dosage Related Efficacy and Tolerability of Cannabidiol in Children With Treatment-Resistant Epileptic Encephalopathy: Preliminary Results of the CARE-E Study
Source: PubMed Central journal article supplement (PMC6616248; doi:10.3389/fneur.2019.00716), 2019-07-03
Supplement: Table_1.pdf [file Table_1.pdf]

Supplementary Tables 1a to 1d

Supplementary Table 1a: Participant Sleepiness/Lethargy Side Rating Scores

| Participant | Visit |   |   |   |   |
|-------------|-------|---|---|---|---|
|             | 3     | 4 | 5 | 6 | 7 |
| A-01        | 1     | 0 | 0 | 0 | 0 |
| A-02        | 0     | 0 | 0 | 0 | 0 |
| A-03        | 2     | 1 | 1 | 3 | 1 |
| A-04        | 1     | 1 | 2 | 1 | 1 |
| A-05        | 1     | 0 | 1 | 2 | 1 |
| A-06        | 1     | 2 | 1 | 2 | 1 |
| A-07        | 0     | 1 | 0 | 1 | 1 |

Supplementary Table 1b: Participant Irritability Rating Scores

| Participant | Visit |   |   |   |   |
|-------------|-------|---|---|---|---|
|             | 3     | 4 | 5 | 6 | 7 |
| A-01        | 3     | 3 | 2 | 3 | 2 |
| A-02        | 0     | 0 | 1 | 0 | 2 |
| A-03        | 2     | 2 | 1 | 3 | 1 |
| A-04        | 2     | 1 | 3 | 3 | 1 |
| A-05        | 3     | 2 | 1 | 3 | 2 |
| A-06        | 1     | 1 | 1 | 1 | 1 |
| A-07        | 1     | 0 | 1 | 1 | 2 |

Supplementary Table 1c: Participant Nausea/Vomiting Rating Scores

| Participant | Visit |   |   |   |   |
|-------------|-------|---|---|---|---|
|             | 3     | 4 | 5 | 6 | 7 |
| A-01        | 0     | 0 | 0 | 0 | 0 |
| A-02        | 0     | 0 | 0 | 0 | 0 |
| A-03        | 1     | 0 | 0 | 4 | 0 |
| A-04        | 1     | 2 | 0 | 3 | 1 |
| A-05        | 0     | 0 | 0 | 1 | 0 |

|             |   |   |   |   |   |
|-------------|---|---|---|---|---|
| <b>A-06</b> | 0 | 0 | 0 | 0 | 0 |
| <b>A-07</b> | 0 | 0 | 0 | 0 | 2 |

Supplementary Table 1d: Participant Diarrhea Rating Scales

| <b>Participant</b> | <b>Visit</b> |          |          |          |          |
|--------------------|--------------|----------|----------|----------|----------|
|                    | <b>3</b>     | <b>4</b> | <b>5</b> | <b>6</b> | <b>7</b> |
| <b>A-01</b>        | 0            | 0        | 0        | 1        | 0        |
| <b>A-02</b>        | 0            | 0        | 0        | 0        | 0        |
| <b>A-03</b>        | 0            | 0        | 0        | 0        | 0        |
| <b>A-04</b>        | 0            | 0        | 0        | 2        | 0        |
| <b>A-05</b>        | 0            | 0        | 1        | 3        | 2        |
| <b>A-06</b>        | 1            | 1        | 0        | 0        | 0        |
| <b>A-07</b>        | 5            | 0        | 2        | 1        | 4        |
