# Supplementary material for: Dosage Related Efficacy and Tolerability of Cannabidiol in Children With Treatment-Resistant Epileptic Encephalopathy: Preliminary Results of the CARE-E Study
Source: PubMed Central journal article supplement (PMC6616248; doi:10.3389/fneur.2019.00716), 2019-07-03
Supplement: Table_2.pdf [file Table_2.pdf]

Supplementary Table 2: Supplemental Table 2 | Clobazam dosage (in mg/kg/day), Clobazam (CBZ), and norclobazam (norCBZ) C<sub>ss</sub>,Min plasma concentrations for the four participants taking clobazam in conjunction with CHE. Levels at Visit 6 for participants A-02 and A-03 are not available (N/A) for analysis. Also included are reported side effects attributed to an interaction between clobazam and CHE and the resultant changes in clobazam doses. All participants had resolution of their reported side effects with decreased clobazam dosing.

| Participant | Visit | CBZ dosage (mg/kg/day) | CBZ level (nmol/l) Reference (150-1000 nmol/l) | norCBZ level (nmol/l) Reference (2800-14,000 nmol/l) | Side effect reported               | Action Taken                        |
|-------------|-------|------------------------|------------------------------------------------|------------------------------------------------------|------------------------------------|-------------------------------------|
| A-01        | 2     | 1.2                    | 4038                                           | 44798                                                | -                                  | -                                   |
|             | 3     | 1.2                    | 4327                                           | 62022                                                | Excessive sleepiness               | Decrease clobazam to 1 mg/kg/day    |
|             | 4     | 1.0                    | 2894                                           | 45096                                                | -                                  | -                                   |
|             | 5     | 1.0                    | 1835                                           | 24298                                                | -                                  | -                                   |
|             | 6     | 1.0                    | 1545                                           | 24230                                                | -                                  | -                                   |
| A-02        | 2     | 0.3                    | 687                                            | 3486                                                 | -                                  | -                                   |
|             | 3     | 0.3                    | 286                                            | 3108                                                 | -                                  | -                                   |
|             | 4     | 0.3                    | 133                                            | 1949                                                 | Increased Irritability             | Decrease clobazam to 0.15 mg/kg/day |
|             | 5     | 0.15                   | 91                                             | 779                                                  | -                                  | -                                   |
|             | 6     | 0.15                   | N/A                                            | N/A                                                  | -                                  | -                                   |
| A-03        | 2     | 1.2                    | 747                                            | 2143                                                 | Increased sleepiness after visit 2 | Decrease clobazam to 0.8 mg/kg/day  |
|             | 3     | 0.8                    | 1145                                           | 5892                                                 | -                                  | -                                   |
|             | 4     | 0.8                    | 1068                                           | 11881                                                | -                                  | -                                   |
|             | 5     | 0.8                    | 812                                            | 6317                                                 | -                                  | -                                   |
|             | 6     | 0.8                    | N/A                                            | N/A                                                  | -                                  | -                                   |
| A-07        | 2     | 1.1                    | 1840                                           | 5350                                                 | -                                  | -                                   |
|             | 3     | 1.1                    | 1550                                           | 12080                                                | -                                  | -                                   |
|             | 4     | 1.1                    | <50                                            | 5850                                                 | -                                  | -                                   |
|             | 5     | 1.1                    | 920                                            | 16320                                                | -                                  | -                                   |
|             | 6     | 1.1                    | 760                                            | 24440                                                | -                                  | -                                   |
